# Supplementary material for: Extraction of lineaments using satellite imagery for a seismic zone of the Sarpol Zahab Region
Source: Research Square preprint supplement (doi:10.21203/rs.3.rs-4170041/v1), 2024-04-11
Supplement: Supplementary file 1 [file 064cf75c519f3ad2051f1a16.docx]

**Table1.**The dataset of Landsat OLI 8 bands used in this study

| Bands | Wavelength (µm) | Resolution (m) |
| --- | --- | --- |
| B2 - Blue | 0.45 - 51 | 30 |
| B3 - Green | 0.53 -0.59 | 30 |
| B4 - Red | 0.64 – 0.67 | 30 |
| B5 – Near Infrared NIR | 0.85 – 0.88 | 30 |
| B6 – SWIR1 | 1.57 – 1.65 | 30 |
| B7 - SWIR2 | 2.11 – 2.29 | 30 |
| B8 - Panchromatic | 0.50 – 0.68 | 15 |
