# Supplementary material for: Extraction of lineaments using satellite imagery for a seismic zone of the Sarpol Zahab Region
Source: Research Square preprint supplement (doi:10.21203/rs.3.rs-4170041/v1), 2024-04-11
Supplement: Supplementary file 2 [file bbbb0c59f3a343104728e1f4.docx]

**Table2.** Basic Geomantica 2015 software settings for automated lineament extraction

| Parameter | Value |
| --- | --- |
| Filter radius (pixel) | 5 |
| Edg Gradient Threshold | 20 |
| Curve Length Threshold (pixel) | 100 |
| Line fitting Error Threshold | 3 |
| Angular Difference Threshold (Degrees) | 30 |
| Linking Distance Threshold (pixel) | 50 |
